# Supplementary material for: Targeting the Pentose Phosphate Pathway for SARS-CoV-2 Therapy
Source: MDPI journal article supplement (doi:10.3390/metabo11100699), 2021-10-13
Supplement: s1 [file s1]

**Figure S1**

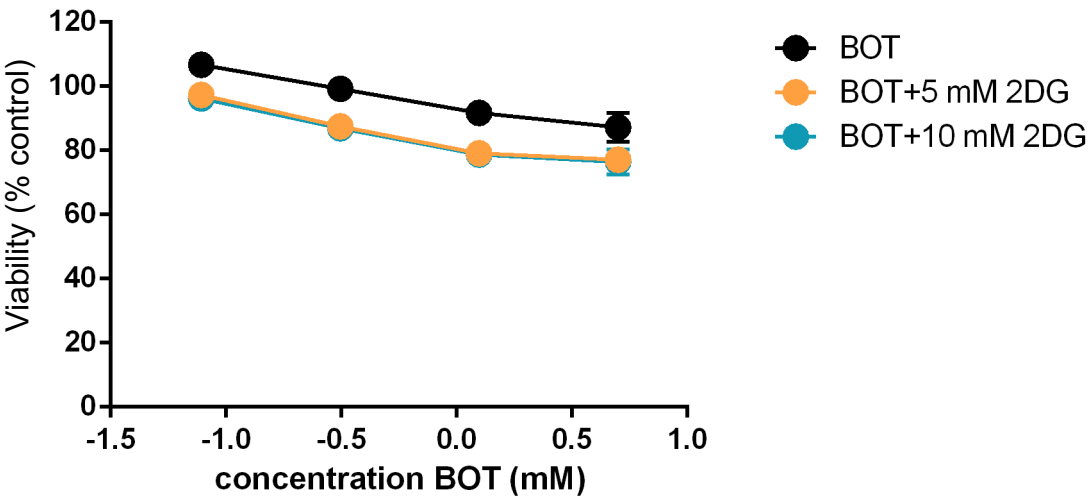

**Figure S1.** Effects of Benfooxythiamine (BOT) with or without 2-deoxy-D-glucose (2DG) on the viability of non-infected Caco-2 cells treated analogously to SARS-CoV-2-infected cells in Figure 4 as determined by MTT assay.
